# Supplementary material for: The challenge of mapping the human connectome based on diffusion tractography
Source: PubMed Central journal article supplement (PMC5677006; doi:10.1038/s41467-017-01285-x), 2017-11-07
Supplement: 41467_2017_1285_MOESM3_ESM.pdf [file 41467_2017_1285_MOESM3_ESM.pdf]

**File Name:** Supplementary Software 1

**Description:** Source code of scoring system used

**File Name:** Supplementary Movie 1

**Description:** Exemplary bottleneck situation in temporal lobe area of simulated phantom

**File Name:** Supplementary Movie 2

**Description:** Exemplary bottleneck situation in temporal lobe area of in-vivo HCP data set

**File Name:** Supplementary Movie 3

**Description:** Visualization of the phantom raw diffusion-weighted images
